# Supplementary material for: Increased Ethanol Production by Disrupting the Competitive Phosphoenolpyruvate Synthesis Pathway and Enhancing the Expression of Ethanol-producing Genes in Synechocystis Sp. PCC6803
Source: Research Square preprint supplement (doi:10.21203/rs.3.rs-75442/v1), 2020-10-06
Supplement: Supplementary file 1 [file ff95f841a0436892bc8e1a2a.docx]

Supplementary Material

Sequence

*PCPC560*

ACCTGTAGAGAAGAGTCCCTGAATATCAAAATGGTGGGATAAAAAGCTCAAAAAGGAAA GTAGGCTGTGGTTCCCTAGGCAACAGTCTTCCCTACCCCACTGGAAACTAAAAAAACGAGAAAAGTTCGCACCGAACATCAATTGCATAATTTTAGCCCTAAAACATAAGCTGAACGAAACTGGTTGTCTTCCCTTCCCAATCCAGGACAATCTGAGAATCCCCTGCAACATTACTTAACAAAAAAGCAGGAATAAAATTAACAAGATGTAACAGACATAAGTCCCATCACCGTTGTATAAAGTTAACTGTGGGATTGCAAAAGCATTCAAGCCTAGGCGCTGAGCTGTTTGAGCATCCCGGTGGCCCTTGTCGCTGCCTCCGTGTTTCTCCCTGGATTTATTTAGGTAATATCTCTCATAAATCCCCGGGTAGTTAACGAAAGTTAATGGAGATCAGTAACAATAACTCTAGGGTCATTACTTTGGACTCCCTCAGTTTATCCGGGGGAATTGTGTTTAAGAAAATCCCAACTCATAAAGTCAAGTAGGAGATTAATTCA

Pdc

ATGAGTTATACCGTGGGCACCTATTTGGCCGAACGCTTGGTGCAAATTGGCTTGAAACATCATTTTGCCGTGGCCGGCGATTATAACTTAGTGTTGTTAGATAATTTATTGTTGAATAAAAATATGGAACAAGTGTATTGTTGTAATGAATTGAATTGTGGCTTTAGTGCCGAAGGCTATGCCCGCGCCAAAGGCGCCGCCGCCGCCGTGGTGACCTATTCCGTGGGCGCCTTGTCCGCCTTTGATGCCATTGGCGGTGCTTATGCCGAAAATTTGCCCGTGATTTTGATTAGTGGCGCCCCCAATAATAATGATCATGCCGCCGGCCATGTGTTGCATCATGCCTTGGGCAAAACCGATTATCACTATCAATTAGAAATGGCCAAAAATATTACCGCCGCCGCCGAAGCCATTTATACCCCCGAAGAAGCCCCCGCCAAAATTGATCATGTGATTAAAACCGCCTTGCGCGAGAAAAAACCCGTGTATTTGGAAATTGCCTGTAATATTGCCTCCATGCCCTGTGCCGCCCCCGGCCCCGCCTCCGCCTTGTTTAATGATGAAGCCTCCGATGAAGCCAGTCTGAATGCCGCCGTGGAAGAAACCTTAAAATTTATTGCCAATCGCGATAAAGTGGCCGTGTTGGTGGGCTCCAAATTGCGGGCCGCGGGTGCCGAAGAAGCCGCCGTGAAATTTGCCGATGCCTTAGGCGGCGCCGTGGCCACCATGGCCGCCGCCAAATCCTTCTTTCCCGAAGAAAATCCCCATTATATTGGGACCTCCTGGGGTGAAGTGAGTTATCCCGGCGTGGAAAAAACCATGAAAGAAGCCGATGCCGTGATTGCCTTAGCCCCCGTGTTTAATGATTATTC

YqhD

ATGAACAACTTTAATCTGCACACCCCAACCCGCATTCTGTTTGGTAAAGGCGCAATCGCTGGTTTACGCGAACAAATTCCTCACGATGCTCGCGTATTGATTACCTACGGCGGCGGCAGCGTGAAAAAAACCGGCGTTCTCGATCAAGTTCTGGATGCCCTGAAAGGCATGGACGTGCTGGAATTTGGCGGTATTGAGCCAAACCCGGCTTATGAAACGCTGATGAACGCCGTGAAACTGGTTCGCGAACAGAAAGTGACTTTCCTGCTGGCGGTTGGCGGCGGTTCTGTACTGGACGGCACCAAATTTATCGCCGCAGCGGCTAACTATCCGGAAAATATCGATCCGTGGCACATTCTGCAAACGGGCGGTAAAGAGATTAAAAGCGCCATCCCGATGGGCTGTGTGCTGACGCTGCCAGCAACCGGTTCAGAATCCAACGCAGGCGCGGTGATCTCCCGTAAAACCACAGGCGACAAGCAGGCGTTCCATTCTGCCCATGTTCAGCCGGTATTTGCCGTGCTCGATCCGGTTTATACCTACACCCTGCCGCCGCGTCAGGTGGCTAACGGCGTAGTGGACGCCTTTGTACACACCGTGGAACAGTATGTTACCAAACCGGTTGATGCCAAAATTCAGGACCGTTTCGCAGAAGGCATTTTGCTGACGCTAATCGAAGATGGTCCGAAAGCCCTGAAAGAGCCAGAAAACTACGATGTGCGCGCCAACGTCATGTGGGCGGCGACTCAGGCGCTGAACGGTTTGATTGGCGCTGGCGTACCGCAGGACTGGGCAACGCATATGCTGGGCCACGAACTGACTGCGATGCACGGTCTGGATCACGCGCAAACACTGGCTATCGTCCTGCCTGCACTGTGGAATGAAAAACGCGATACCAAGCGCGCTAAGCTGCTGCAATATGCTGAACGCGTCTGGAACATCACTGAAGGTTCCGATGATGAGCGTATTGACGCCGCGATTGCCGCAACCCGCAATTTCTTTGAGCAATTAGGCGTGCCGACCCACCTCTCCGACTACGGTCTGGACGGCAGCTCCATCCCGGCTTTGCTGAAAAAACTGGAAGAGCACGGCATGACCCAACTGGGCGAAAATCATGACATTACGTTGGATGTCAGCCGCCGTATATACGAAGCCGCCCGCTAA

Slr0301 UP

GCATTAACTCCCGCAGAAAGGGAAAAGTTTCCCCCGCTCTGTCCAGATTTTGTGTTGGAACTACTTTCCCCCAGTGATGCCCTAGCTGCAACTCAAGCAAAAATGCGTGAATATTTAAGCTGTGGAACGGAGTTAGGCTGGTTAATTAATCCGATTGATCAACAAGTGGAAATATATCGCCCTGATTCCCCGATAGAAATATTAAACAAACCCCAAACACTCAATGGCGATCGCCTGTTGCCGGACTTGGAACTCAATGTGGCTTGGTTATGGGGGGCAAACTAATTCAGAATCTCCATGACACTTCAAAGACTTGCCTATTACCTTCATAAGAAAATAGGGATATTAATAATTGCCGAGTAACAAGGCACATATGGGTATGATAGCGCGAATTTCCACCCTAGGACAATTTTTTAATAATTAATTAACACTAGATTTAAGAAACCTATCAATTTATAAATAATTACCAACAAAATAAAGTTTACTATATCAACCTCGATAAACTGAAGGTATCGATTAGGGGTAAATAGATATGGTAAGTTCAGTCGTCGAAAAAACCTCTGTAGCCCATAAAGAAACGGCTTTAATCCTCTGGTTTGAAGAGGTGGGCACCCATGAT

Slr0301 down

CGGCTTCTCCATTGGCTCCAATGATTTAACCCAATTAACTTTAGGTTTAGACCGGGATTCTTCCCTCGTTGCCCATCTGTTTGATGAACGCAATCTAGGGGTCAAACGGATGGTCAAAATGGCCATTGAAACGGCGAAAGCTAACGGTCGCAAAATCGGTATCTGTGGCCAAGCCCCCTCGGATTATCCTGAGTTTGCTGAATTTTTAGTGGAATTGGGCATTGATTCCATTAGCTTAAACCCTGATTCTGTGCTGAAAACTGTTCTACGCATTGCAGAGGTGGAAAAAGCCCTAGGCTAGGAAATGGTGTTTATTTTGCCGACTAAGGCTAAACCATAAATACAGCCCCTTCTTTCCCGCTGGTTCAATTCCAAGGGTAAGGAGGGGTTAAAATGCAGTCAATATTAAGAGTGGATGGTTCATTTTGGGCAAGGGTTAAAAACCTTTAAATTTTGGATGATTGCCAGGGCAAGTCTTTGACATCCCGCAGAGAAAATTATGGGAAGTAATGGCTACATCAGTTGATTCAAATCAGTTAAAGGGGCTTCGCCCGGCAAAACCATGAGCGATCGCCACAAAACCAAAGCTCAATTACTCCAGGAAATGGAGAGGTTGAGGGCG

*PpetE*

CGGCGATCGCCAAAAACAAAGAAAATTCAGCAATTACCGTGGGTAGCAAAAAATCCCCATCTAAAGTTCAGTAAATATAGCTAGAACAACCAAGCATTTTCGGCAAAGTACTATTCAGATAGAACGAGAAATGAGCTTGTTCTATCCGCCCGGGGCTGAGGCTGTATAATCTACGACGGGCTGTCAAACATTGTGATACCATGGGCAGAAGAAAGGAAAAACGTCCCTGATCGCCTTTTTGGGCACGGAGTAGGGCGTTACCCCGGCCCGTTCAACCACAAGTCCCTATAGATACAATCGCCAAGAAGT

*Sp*

ATGAGGGAAGCGGTGATCGCCGAAGTATCGACTCAACTATCAGAGGTAGTTGGCGTCATCGAGCGCCATCTCGAACCGACGTTGCTGGCCGTACATTTGTACGGCTCCGCAGTGGATGGCGGCCTGAAGCCACACAGTGATATTGATTTGCTGGTTACGGTGACCGTAAGGCTTGATGAAACAACGCGGCGAGCTTTGATCAACGACCTTTTGGAAACTTCGGCTTCCCCTGGAGAGAGCGAGATTCTCCGCGCTGTAGAAGTCACCATTGTTGTGCACGACGACATCATTCCGTGGCGTTATCCAGCTAAGCGCGAACTGCAATTTGGAGAATGGCAGCGCAATGACATTCTTGCAGGTATCTTCGAGCCAGCCACGATCGACATTGATCTGGCTATCTTGCTGACAAAAGCAAGAGAACATAGCGTTGCCTTGGTAGGTCCAGCGGCGGAGGAACTCTTTGATCCGGTTCCTGAACAGGATCTATTTGAGGCGCTAAATGAAACCTTAACGCTATGGAACTCGCCGCCCGACTGGGCTGGCGATGAGCGAAATGTAGTGCTTACGTTGTCCCGCATTTGGTACAGCGCAGTAACCGGCAAAATCGCGCCGAAGGATGTCGCTGCCGACTGGGCAATGGAGCGCCTGCCGGCCCAGTATCAGCCCGTCATACTTGAAGCTAGACAGGCTTATCTTGGACAAGAAGAAGATCGCTTGGCCTCGCGCGCAGATCAGTTGGAAGAATTTGTCCACTACGTGAAAGGCGAGATCACCAAGGTAGTCGGCAAATAA

Slr0168 up

GAGCGGCACCACGGGGCACCACCGCCACTCTCCGCTGCGCTTGACGCAGCGGCACAGGATGTCCTGACCGCCAGCGCCCTTCAGCACCTGGAAAAACTGCAGCACCTTCTTGCTGTAGTTCTTGGCGCCG CCCTGCACTGCCGCCCCCCCTCCCGCACCCCGCCGCCGCCGGCCTGAGGGCGCCTGCTCGTCGCCCTGCTTGATCCGGATGATGCCCTCT ACATCTGACTTAGTGAGAAACACATTCTTGGCGCCGTTTT GGCGCCGTTCTAAGGCATAAAGGATGACAGGTTGGTTCATAATTTTAAGTTTGCGTCAGCTGCGGGGTGCGGGAGGGGAGAAATAGAAGCCTTAGAGACTCTGAAAGGCGAAGGAAAGGGAGGGATCGCGGGAGAGAGCGTGCCTGATGAGCCAGACGAATCGGGGGAGGTGCCACATCAGCGGGCAACACATGACAAGAGGAAATCACGGACCGGTCACGTTCCCCTCCGGAGGTAACGTTACCTCCGGACCACGGGAGAAGACAGTGACGAATTGAGTTGCAATGCCGAACAGCTCTA CCTGCTCGCTGCGGCCACACGTCGCACGCT GCTGTGCGCCA

Slr0168 down

AGAGCCATGCCCGACGGGCGGCCTGCACGGCTCCCTCGCTCTCTATCTTGCCACTACCTGGCGTGCCGCTACCTGGCGTGCCCAAGCCATTCAATTTTTTTCTGACCACTCCTGTGACCGCTCCCCATGACATGTACCCGTGACAACCCCTTCCCAATCCATGCATTCCAAACTTCTGTCGGGACTCCCCCATGGGGGGGCTGAGGAAATGTTGCGCATGCGCAGTGTGCATACTGCCATCCTCATCTTCCCCCTCCCAAGCCTGGACAGAGAGGCGCCCAAACATGACTTGTAAAGTGATTCGTTGCAGCTGGTGGCATGTGCGATCCCGGGGCACGCCCCAAGCAGTGCGGCAAGGCACATGCAAAATGAGAGGCAGCAGGCACGCACGGCGAAGCGTTACGAGAAGGGAATGCTCTGCATCATGAGGCCGGCTGCCGCAGCCGCCGCCCCGCCCTGCTGCTGCTGCTGCTGCTGCATCGCCTGCTGGGGCGTCAGCGTGGGGGCGGCTCCCGCGGCGGCTGGCGCCGGCGGGGCGCTGCCGACGTACAGCTTGCGCAGGGCGGGGAGCAGCGCCAGC TGGGGCGGCA GCTGGTCATGC
